# Supplementary material for: Pore size-controlled gases and alcohols separation within ultramicroporous homochiral lanthanide–organic frameworks
Source: Royal Society of Chemistry journal article supplement (doi:10.1039/c2jm16324a), 2012-01-01
Supplement: c2jm16324a.pdf [file c2jm16324a.pdf]

## Supporting Information

### Poresize-controlled Gases and Alcohols Separation within Ultramicroporous Homochiral Lanthanide-Organic Frameworks

Zhongjun Lin,<sup>a</sup> Ruqiang Zou,<sup>a,\*</sup> Jie Liang,<sup>b</sup> Wei Xia,<sup>a</sup> Dingguo Xia,<sup>a</sup> Yingxia Wang,<sup>b</sup> Jianhua Lin,<sup>b</sup> Tongliang Hu,<sup>d</sup> Qiang Chen,<sup>d</sup> Xidong Wang,<sup>a</sup> Yusheng Zhao,<sup>a</sup> and Anthony K. Burrell<sup>c,\*</sup>

<sup>a</sup> College of Engineering, Peking University, Beijing 100871, China. E-mail: rzou@pku.edu.cn. <sup>b</sup> College of Chemistry and Molecule Engineering, Peking University, Beijing 100871, China. <sup>c</sup> Chemical Sciences and Engineering Division, Argonne National Laboratory, 9700 S. Cass Avenue, Argonne, IL 60439. E-mail: Burrell@anl.gov. <sup>d</sup> Department of Chemistry, Nankai University, Beijing 300071, China.

**Table S1** Selected bond distances (Å) and angles (°) for **1**.

|                     |            |                     |           |
|---------------------|------------|---------------------|-----------|
| Ce(1)-O(3)#1        | 2.403(8)   | Ce(1)-O(2)#5        | 2.509(7)  |
| Ce(1)-O(3)#2        | 2.403(8)   | Ce(1)-O(1W)         | 2.539(15) |
| Ce(1)-O(1)#3        | 2.497(8)   | Ce(1)-O(1)          | 2.497(8)  |
| Ce(1)-O(2)#4        | 2.509(7)   |                     |           |
| O(1)#3-Ce(1)-O(1)   | 150.2(5)   | O(3)#1-Ce(1)-O(2)#4 | 137.9(3)  |
| O(3)#1-Ce(1)-O(3)#2 | 77.3(5)    | O(3)#2-Ce(1)-O(2)#4 | 72.5(3)   |
| O(3)#1-Ce(1)-O(1)#3 | 126.2(3)   | O(1)#3-Ce(1)-O(2)#4 | 75.8(3)   |
| O(3)#2-Ce(1)-O(1)#3 | 79.1(4)    | O(1)-Ce(1)-O(2)#4   | 95.8(3)   |
| O(3)#1-Ce(1)-O(1)   | 79.1(4)    | O(3)#1-Ce(1)-O(2)#5 | 72.5(3)   |
| O(3)#2-Ce(1)-O(1)   | 126.2(3)   | O(3)#2-Ce(1)-O(2)#5 | 137.9(3)  |
| O(1)#3-Ce(1)-O(2)   | 142.3(3)   | O(1)#3-Ce(1)-O(2)#5 | 95.8(3)   |
| O(1)-Ce(1)-O(2)     | 49.3(2)    | O(1)-Ce(1)-O(2)#5   | 75.8(3)   |
| O(2)#4-Ce(1)-O(2)   | 68.8(3)    | O(2)#4-Ce(1)-O(2)#5 | 147.1(3)  |
| O(2)#5-Ce(1)-O(2)   | 121.0(2)   | O(3)#1-Ce(1)-O(1W)  | 141.4(2)  |
| O(1W)-Ce(1)-O(2)    | 105.79(16) | O(1)#3-Ce(1)-O(1W)  | 75.1(2)   |
| O(3)#1-Ce(1)-O(2)#3 | 78.5(3)    | O(1)-Ce(1)-O(1W)    | 75.1(2)   |
| O(3)#2-Ce(1)-O(2)#3 | 77.0(3)    | O(2)#4-Ce(1)-O(1W)  | 73.56(16) |
| O(1)#3-Ce(1)-O(2)#3 | 49.3(2)    | O(2)#5-Ce(1)-O(1W)  | 73.56(16) |
| O(1)-Ce(1)-O(2)#3   | 142.3(3)   | O(3)#1-Ce(1)-O(2)   | 77.0(3)   |
| O(2)#4-Ce(1)-O(2)#3 | 121.0(2)   | O(3)#2-Ce(1)-O(2)   | 78.5(3)   |
| O(2)#5-Ce(1)-O(2)#3 | 68.8(3)    | O(2)-Ce(1)-O(2)#3   | 148.4(3)  |
| O(1W)-Ce(1)-O(2)#3  | 105.79(16) |                     |           |

<sup>a</sup> Symmetry transformations used to generate equivalent atoms: #1 x-y,-y+1,-z+2; #2 x,y+1,z;

#3 x-y+1,-y+2,-z+2; #4 -y+2,-x+2,-z+11/6; #5 x-y+1,x,z+1/6; #6 -y+1,-x+1,-z+11/6; #7

y,-x+y+1,z-1/6; #8 x,y-1,z

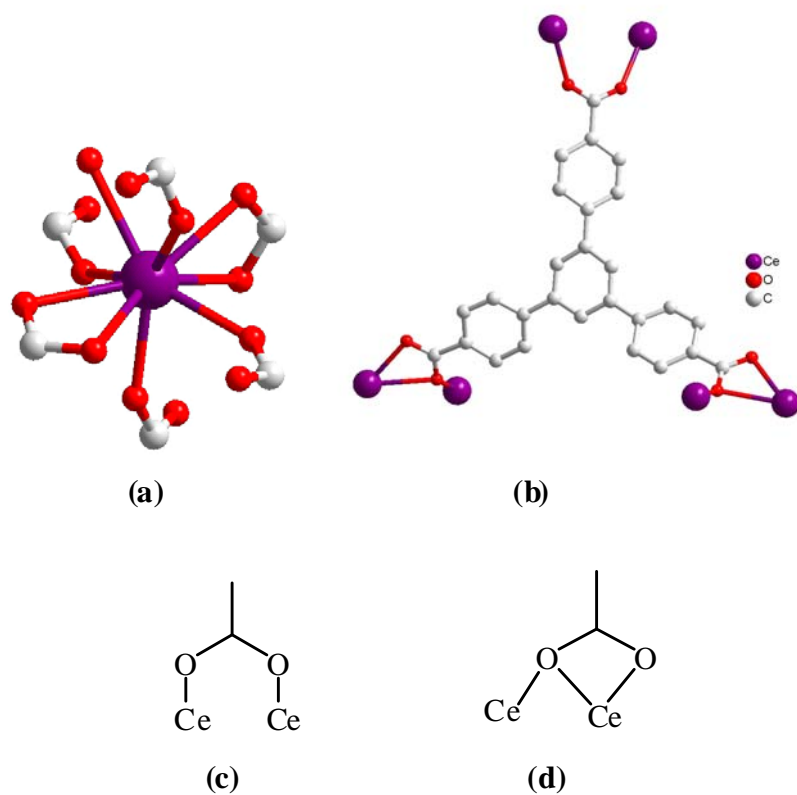

**Figure S1.** (a) The coordination environment of Ce(III). (b) The coordination environment of BTB ligand. (c) and (d) The two types of binding modes of BTB ligand.

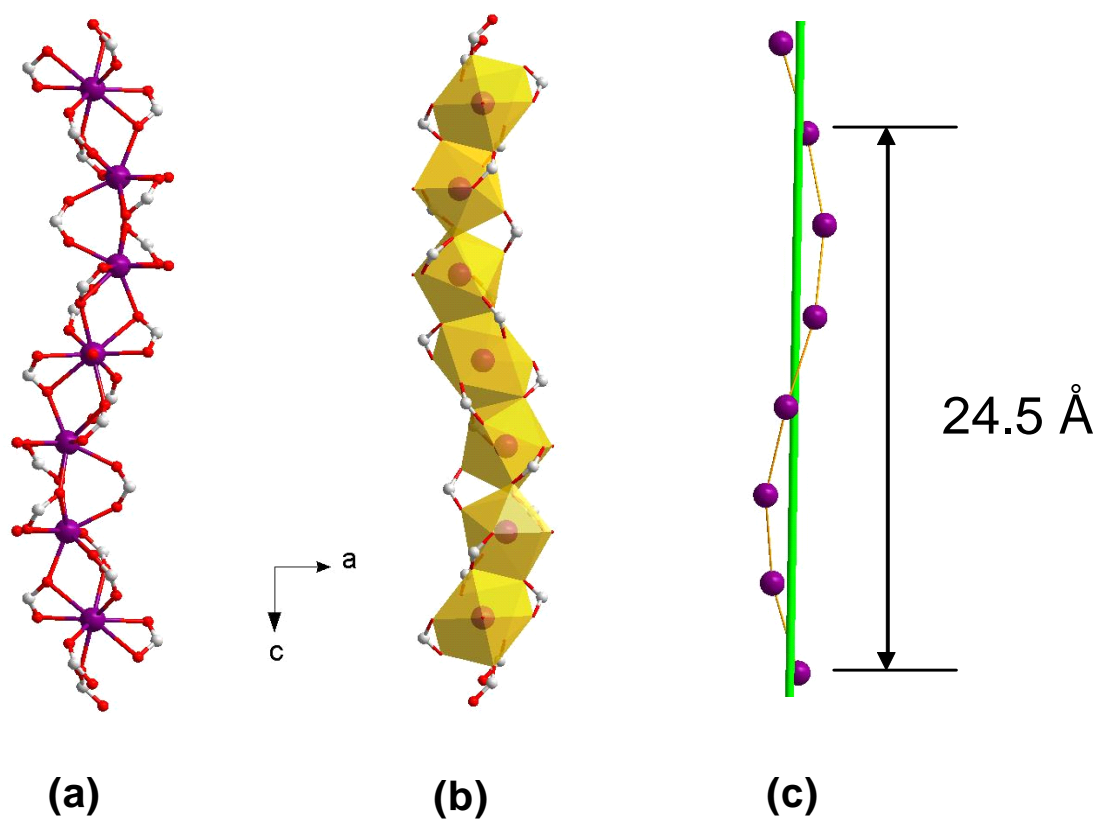

**Figure S2.** (a) and (b) One-dimensional inorganic chain along *c* direction. (c) Helical right-hand metal chain showing seven Ce (III) ions in a unit.

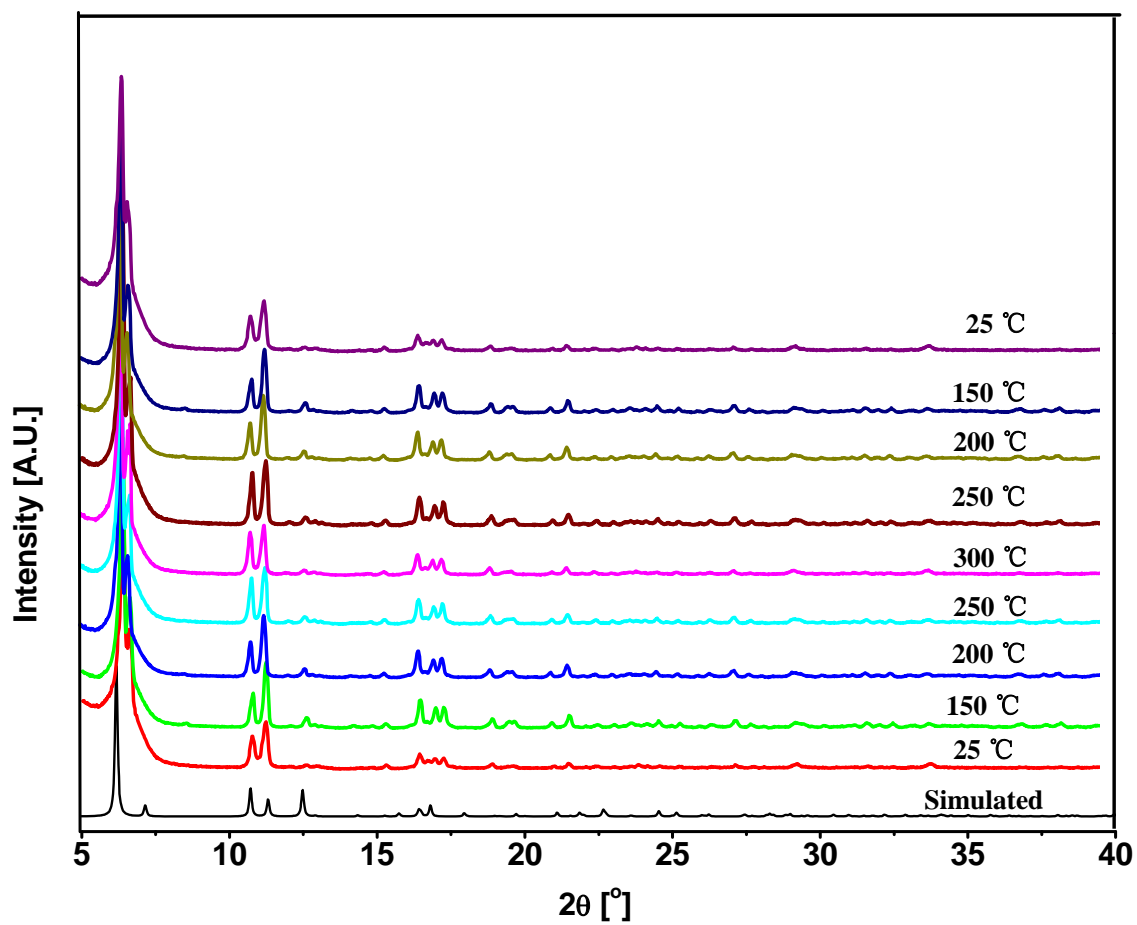

**Figure S3.** Temperature-dependent PXRD patterns of **1** in vacuum.

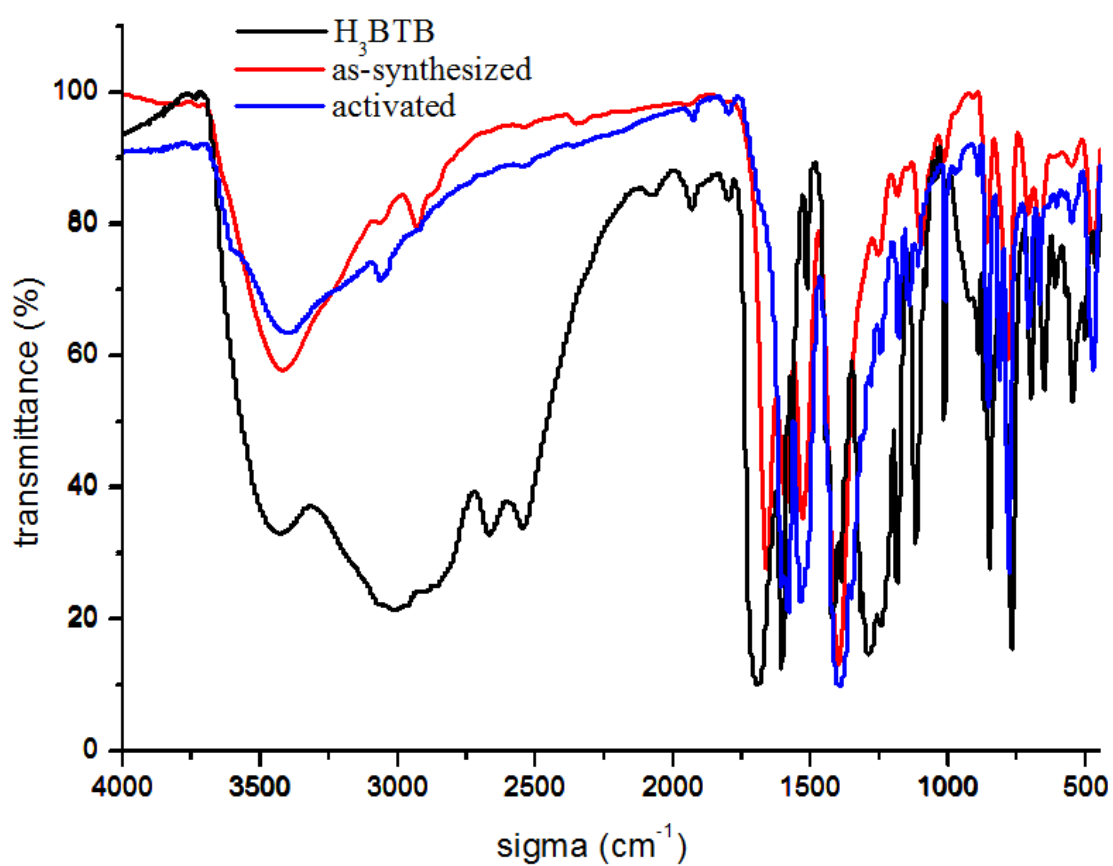

**Figure S4.** FTIR spectra of  $\text{H}_3\text{BTB}$  ligand, as-synthesized sample and activated sample.

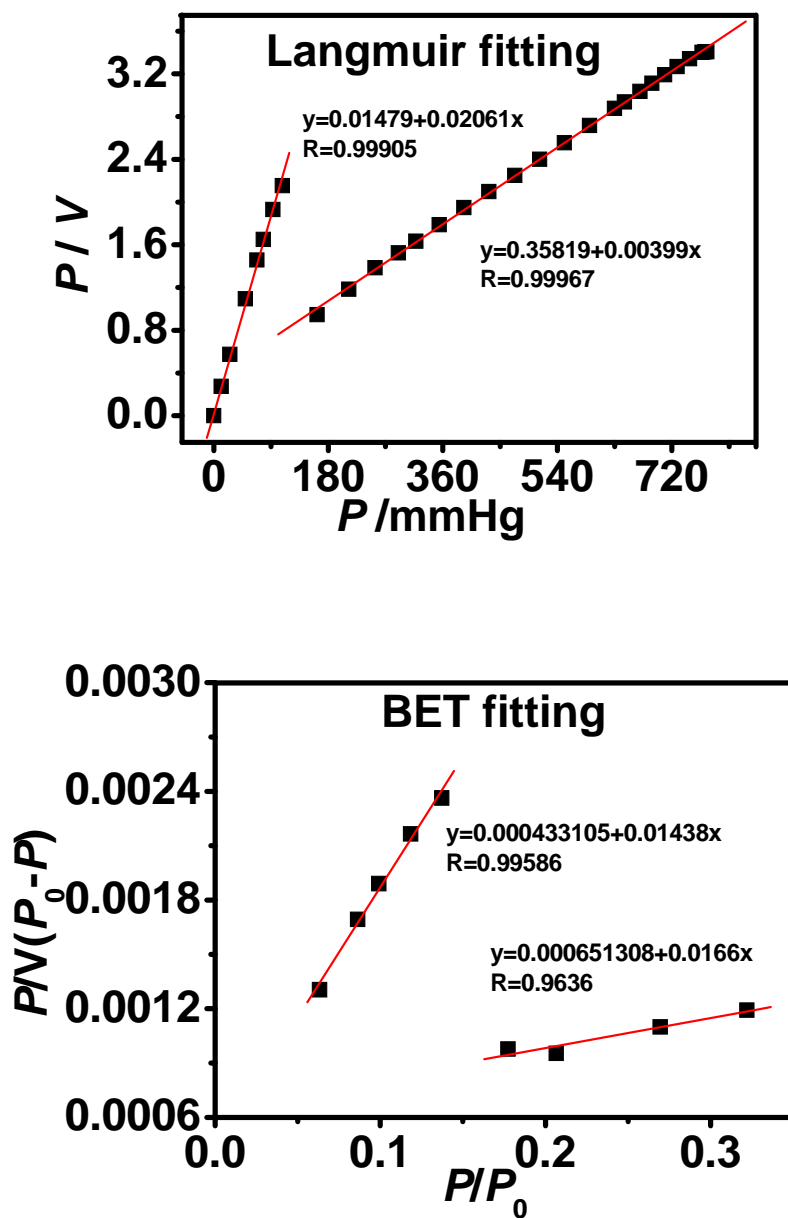

**Figure S5.** Langmuir fitting and BET fitting for  $N_2$  adsorption isotherm at 77K.

The selectivity for CO<sub>2</sub>/N<sub>2</sub>, CH<sub>4</sub>/N<sub>2</sub> and CO<sub>2</sub>/CH<sub>4</sub> were calculated from the Henry constants.<sup>(1)</sup> The CO<sub>2</sub> adsorption isotherm was analysed by using a model based on dual-site Langmuir isotherm model [Eq (1)].

$$V(\text{CO}_2) = \frac{V_1 K_1 P}{1 + K_1 P} + \frac{V_2 K_2 P}{1 + K_2 P} \quad (1)$$

$V(\text{CO}_2)$  is the total volume adsorbed of CO<sub>2</sub>;  $V_1$  and  $V_2$ , calculated adsorbed volume of CO<sub>2</sub> for the two contributions of the dual site Langmuir Isotherm;  $K_1$  and  $K_2$ , calculated stability constants of CO<sub>2</sub> adsorption for the two contributions of the dual site Langmuir isotherm.  $P$  is the applied pressure.

The experimental data corresponding to the CH<sub>4</sub> and N<sub>2</sub> adsorption isotherms were analysed by using single Langmuir isotherms [Eq (2)].

$$V = \frac{V_1 K_1 P}{1 + K_1 P} \quad (2)$$

$V_1$ , calculated adsorbed volume of CH<sub>4</sub>;  $K_1$ , calculated affinity constants;

Fitting of the adsorption branch for CO<sub>2</sub>, CH<sub>4</sub> and N<sub>2</sub> based on the Langmuir isotherm models allowed us to calculate the Henry constants. For CO<sub>2</sub>,  $H(\text{CO}_2) = K_1 \times V_1 + K_2 \times V_2$ , and for other gases,  $H = K_1 \times V_1$ .

The Henry law selectivity for gas  $i$  over gas  $j$  is then expressed by Equation:

$$S_{i/j} = \frac{H_i}{H_j} \quad (3)$$



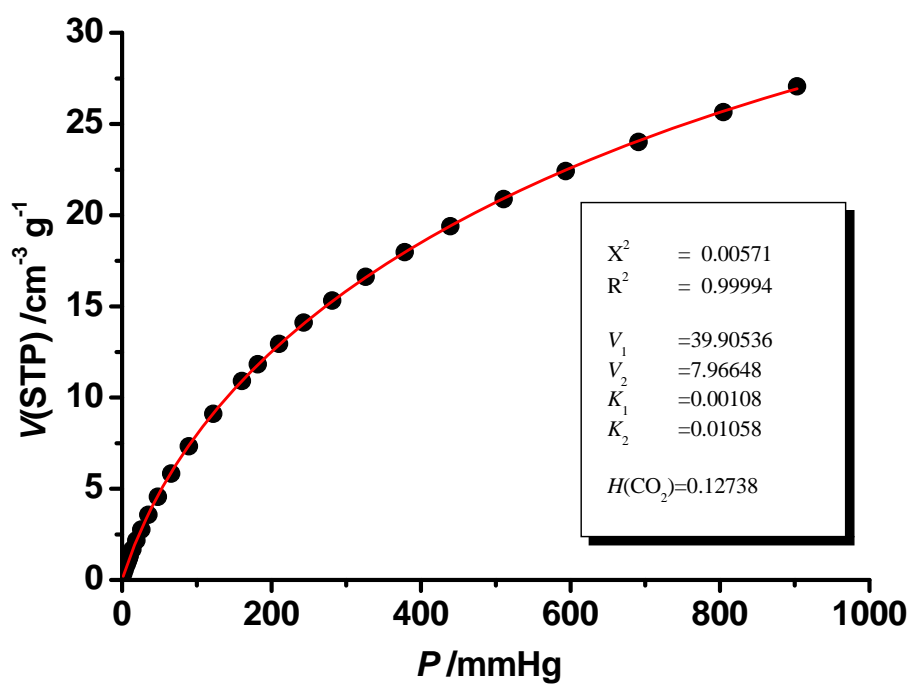

**Figure S6.**  $\text{CO}_2$  isotherm adsorption branch of **1** (filled shape) and fitting based on dual-site Langmuir isotherm model (red line).  $X^2$  and  $R^2$ , fitting error;  $H$ , global Herry's law constant,  $H(\text{CO}_2) = K_1 \times V_1 + K_2 \times V_2$  ( $\text{cm}^3 \text{g}^{-1} \text{mmHg}^{-1}$ ).

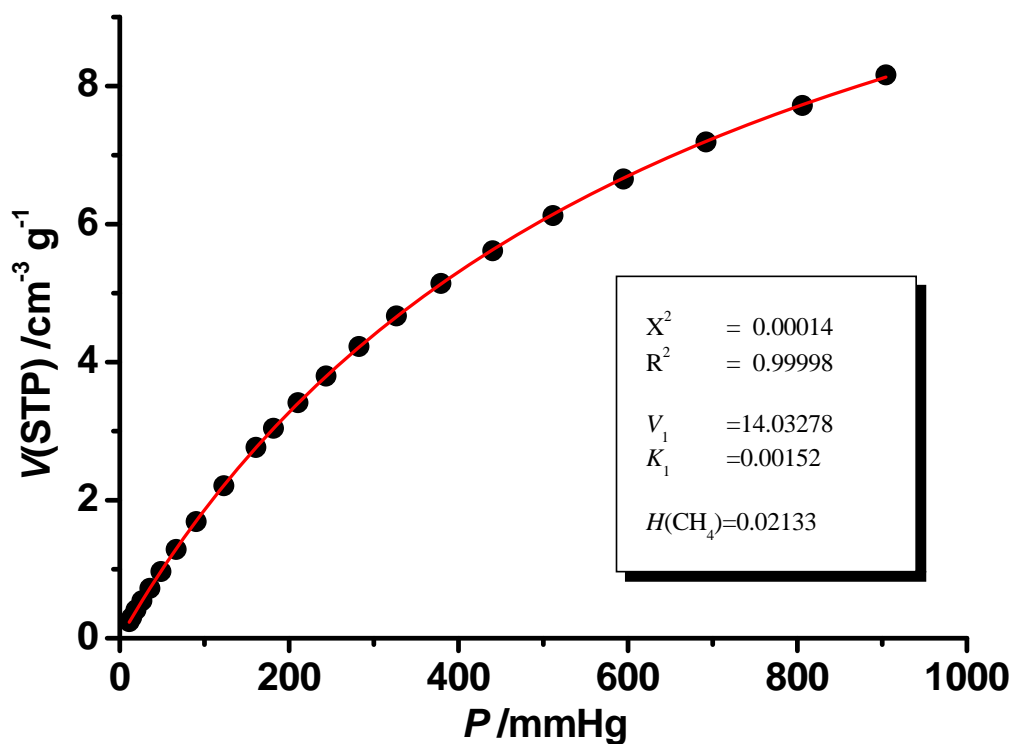

**Figure S7.**  $\text{CH}_4$  isotherm adsorption branch of **1** (filled shape) and fitting based on single Langmuir isotherm model (red line).  $V_1$ , calculated adsorbed volume of  $\text{CH}_4$ ;  $K_1$ , calculated affinity constants;  $X^2$  and  $R^2$ , fitting error;  $H$ , Herry's law constant,  $H(\text{CH}_4) = K_1 \times V_1$  ( $\text{cm}^3 \text{g}^{-1} \text{mmHg}^{-1}$ ).

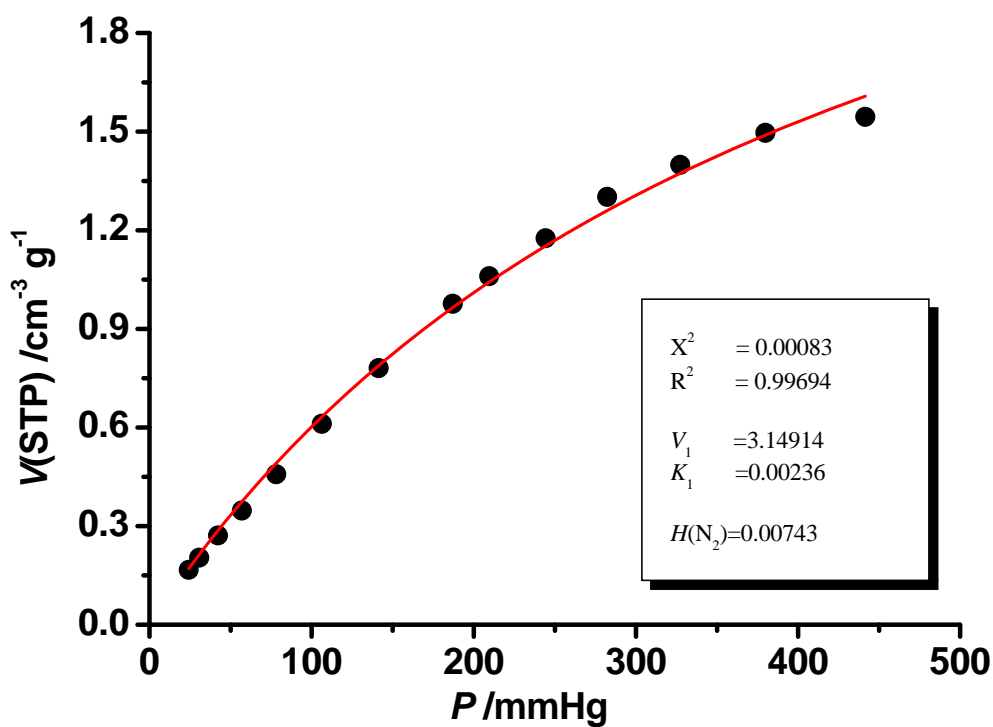

**Figure S8.**  $\text{N}_2$  isotherm adsorption branch of **1** (filled shape) and fitting based on single Langmuir isotherm model (red line).  $V_1$ , calculated adsorbed volume of  $\text{N}_2$ ;  $K_1$ , calculated affinity constants;  $X^2$  and  $R^2$ , fitting error;  $H$ , Henry's law constant,  $H(\text{N}_2) = K_1 \times V_1$  ( $\text{cm}^3 \text{g}^{-1} \text{mmHg}^{-1}$ ).

The Henry's law selectivity can also be calculated based on Toth isotherm model.<sup>(2)</sup>

Toth model:

$$M = \frac{M_{\max} \cdot B^{1/n} \cdot P}{(1 + B \cdot P)^{1/n}} \quad (4)$$

$M$ , gas uptake (mmol/g);  $M_{\max}$ , maximum gas uptake (mmol/g);  $B$  and  $n$ , fitting constants.

Henry's law constant  $H$ :

$$H = \lim_{P \rightarrow 0} \frac{dN}{dP} = B^{1/n} \cdot M_{\max} \quad (5)$$

Henry's law selectivity (upper limit selectivity), gas component  $i$  over  $j$ :

$$S_{i/j} = \frac{H_i}{H_j} \quad (6)$$

All fittings and calculations (Figures S11-S13) were performed based on the mean value of each data set.

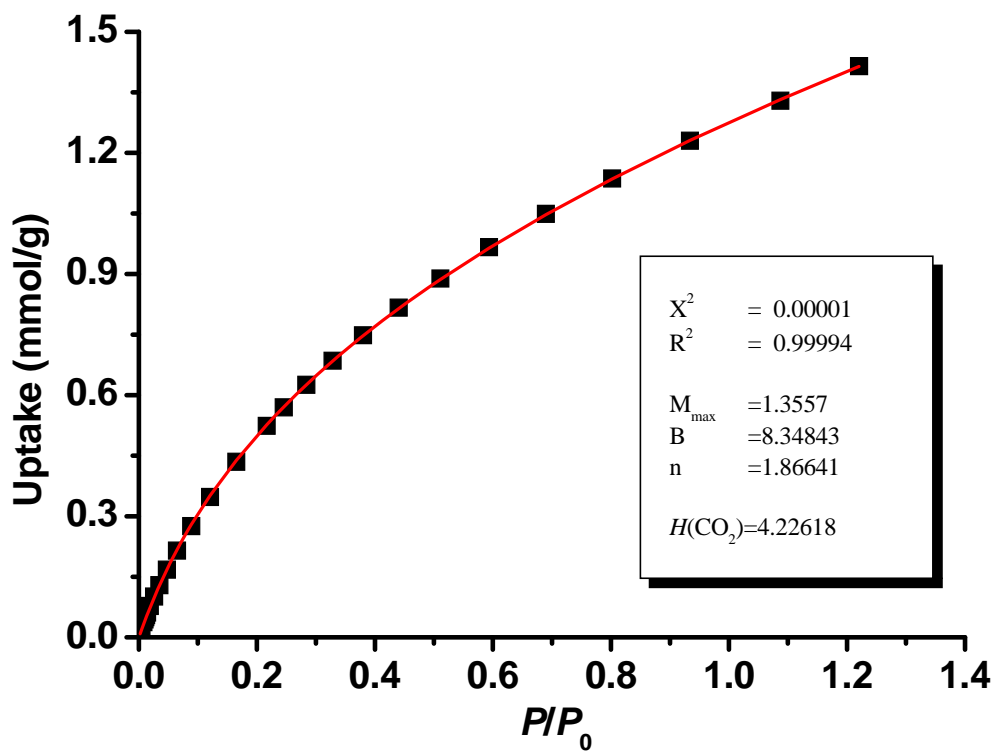

**Figure S9.**  $\text{CO}_2$  isotherm adsorption branch of **1** (filled shape) and fitting based on Toth isotherm model (red line);  $M_{\max}$ , maximum uptake; B and n, fitting constants;  $X^2$  and  $R^2$ , fitting error;  $H$ , Henry's law constant.

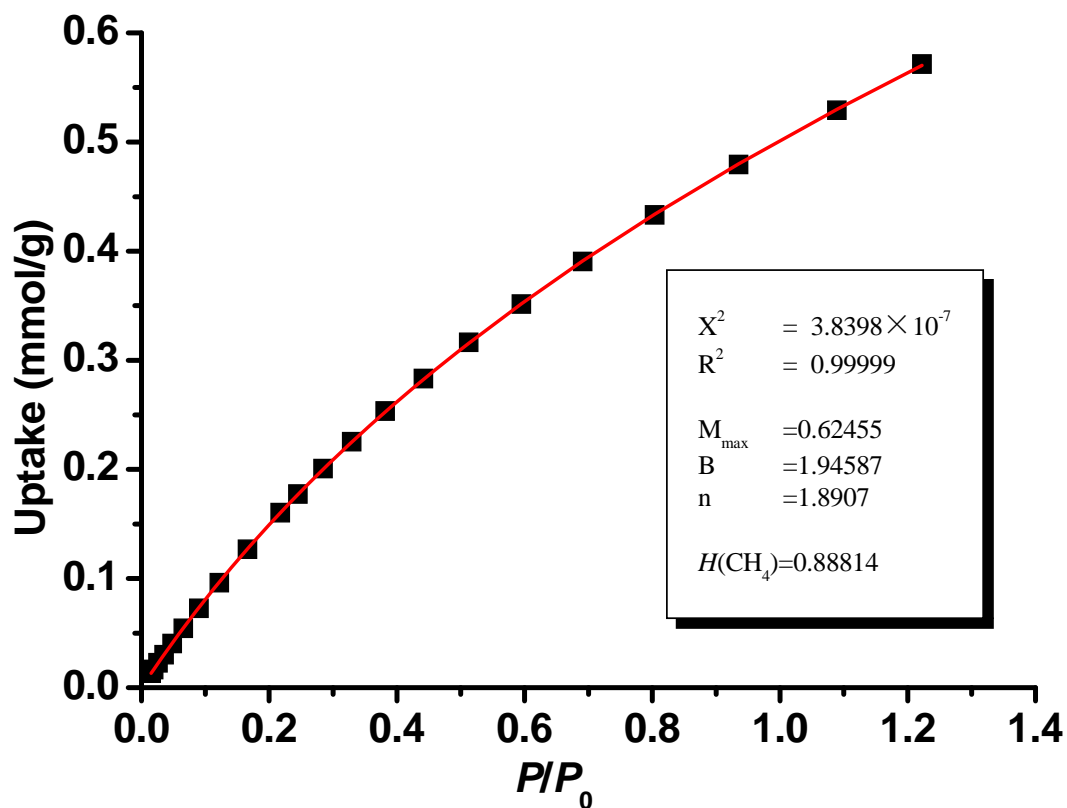

**Figure S10.**  $\text{CH}_4$  isotherm adsorption branch of **1** (filled shape) and fitting based on Toth isotherm model (red line);  $M_{\max}$ , maximum uptake;  $B$  and  $n$ , fitting constants;  $X^2$  and  $R^2$ , fitting error;  $H$ , Henry's law constant.

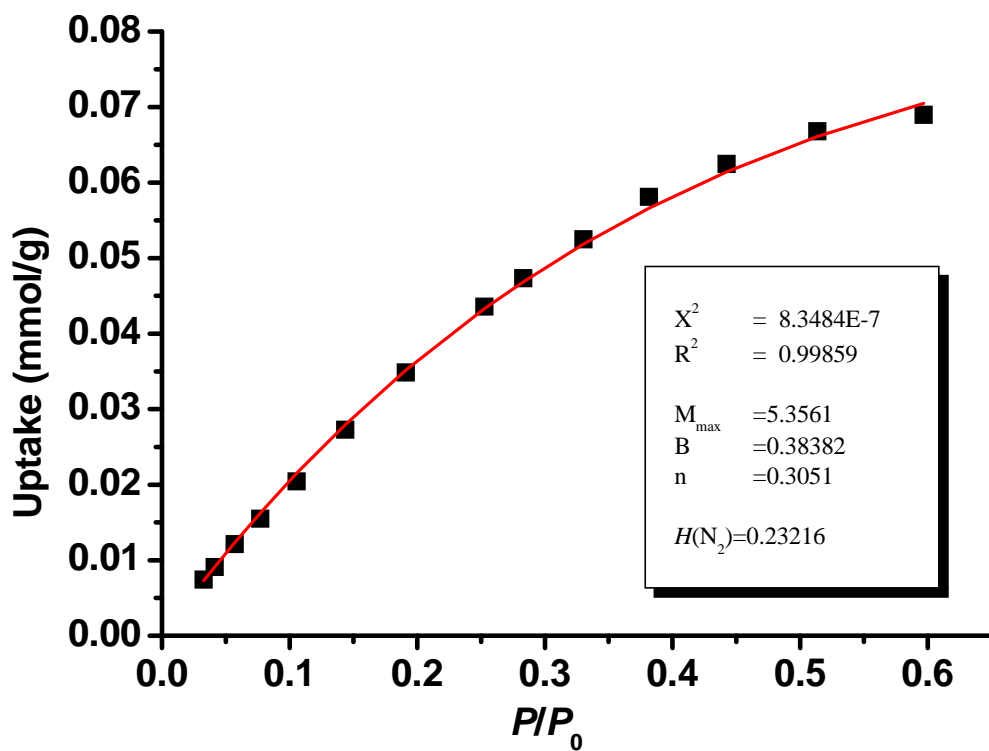

**Figure S11.**  $N_2$  isotherm adsorption branch of **1** (filled shape) and fitting based on Toth isotherm model (red line);  $M_{\max}$ , maximum uptake; B and n, fitting constants;  $X^2$  and  $R^2$ , fitting error;  $H$ , Henry's law constant.

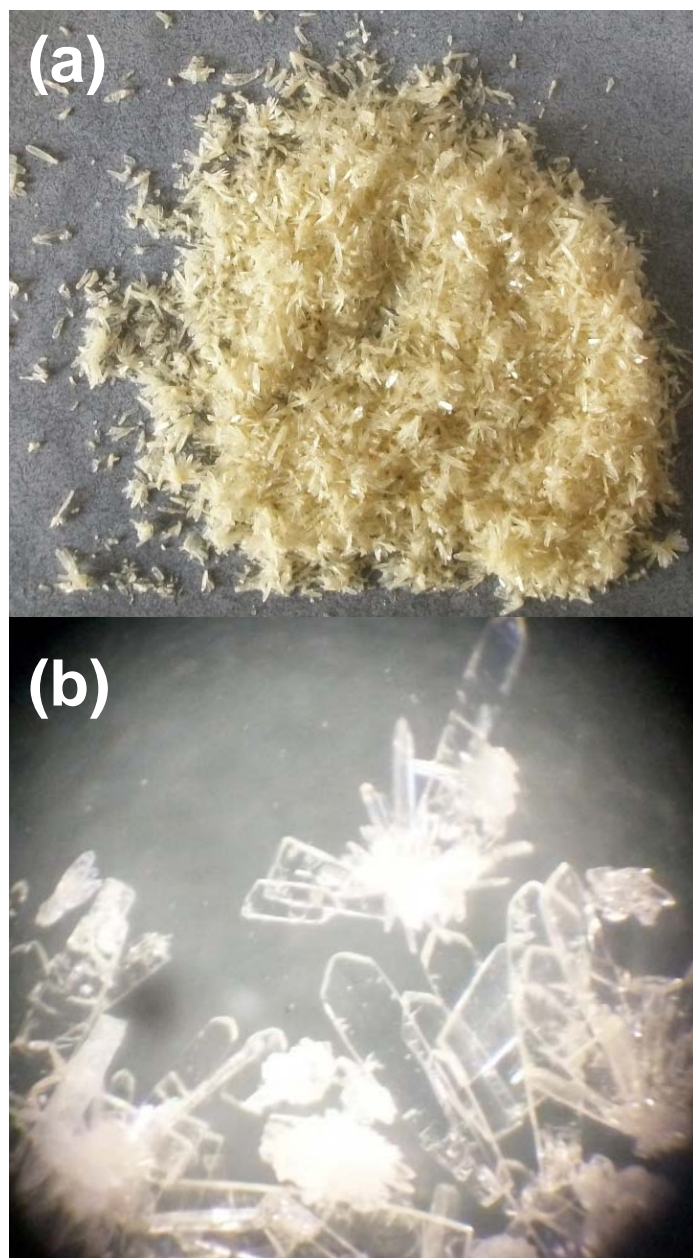

**Figure S12.** Photograph of raw sample of **1** (a) and image under optical microscope (b).  
The average dimension of crystal size is 1.10 mm × 0.20 mm × 0.16 mm.



**Reference:**

- (1) Ortiz G.; Brandes S.; Rousselin Y.; Guillard R. *Chem. Eur. J.* **2011**, *17*, 6689.
- (2) Wang B.; Cote A. P.; Furukawa H.; O’Keeffe M.; Yaghi O. M. *Nature* **2008**, *453*, 207.
